# Supplementary material
Source: Springer Nature journal article supplement (https://www.springermedizin.de/resource/supplementary/12904_2009_76_MOESM1_ESM.pdf/9518100)

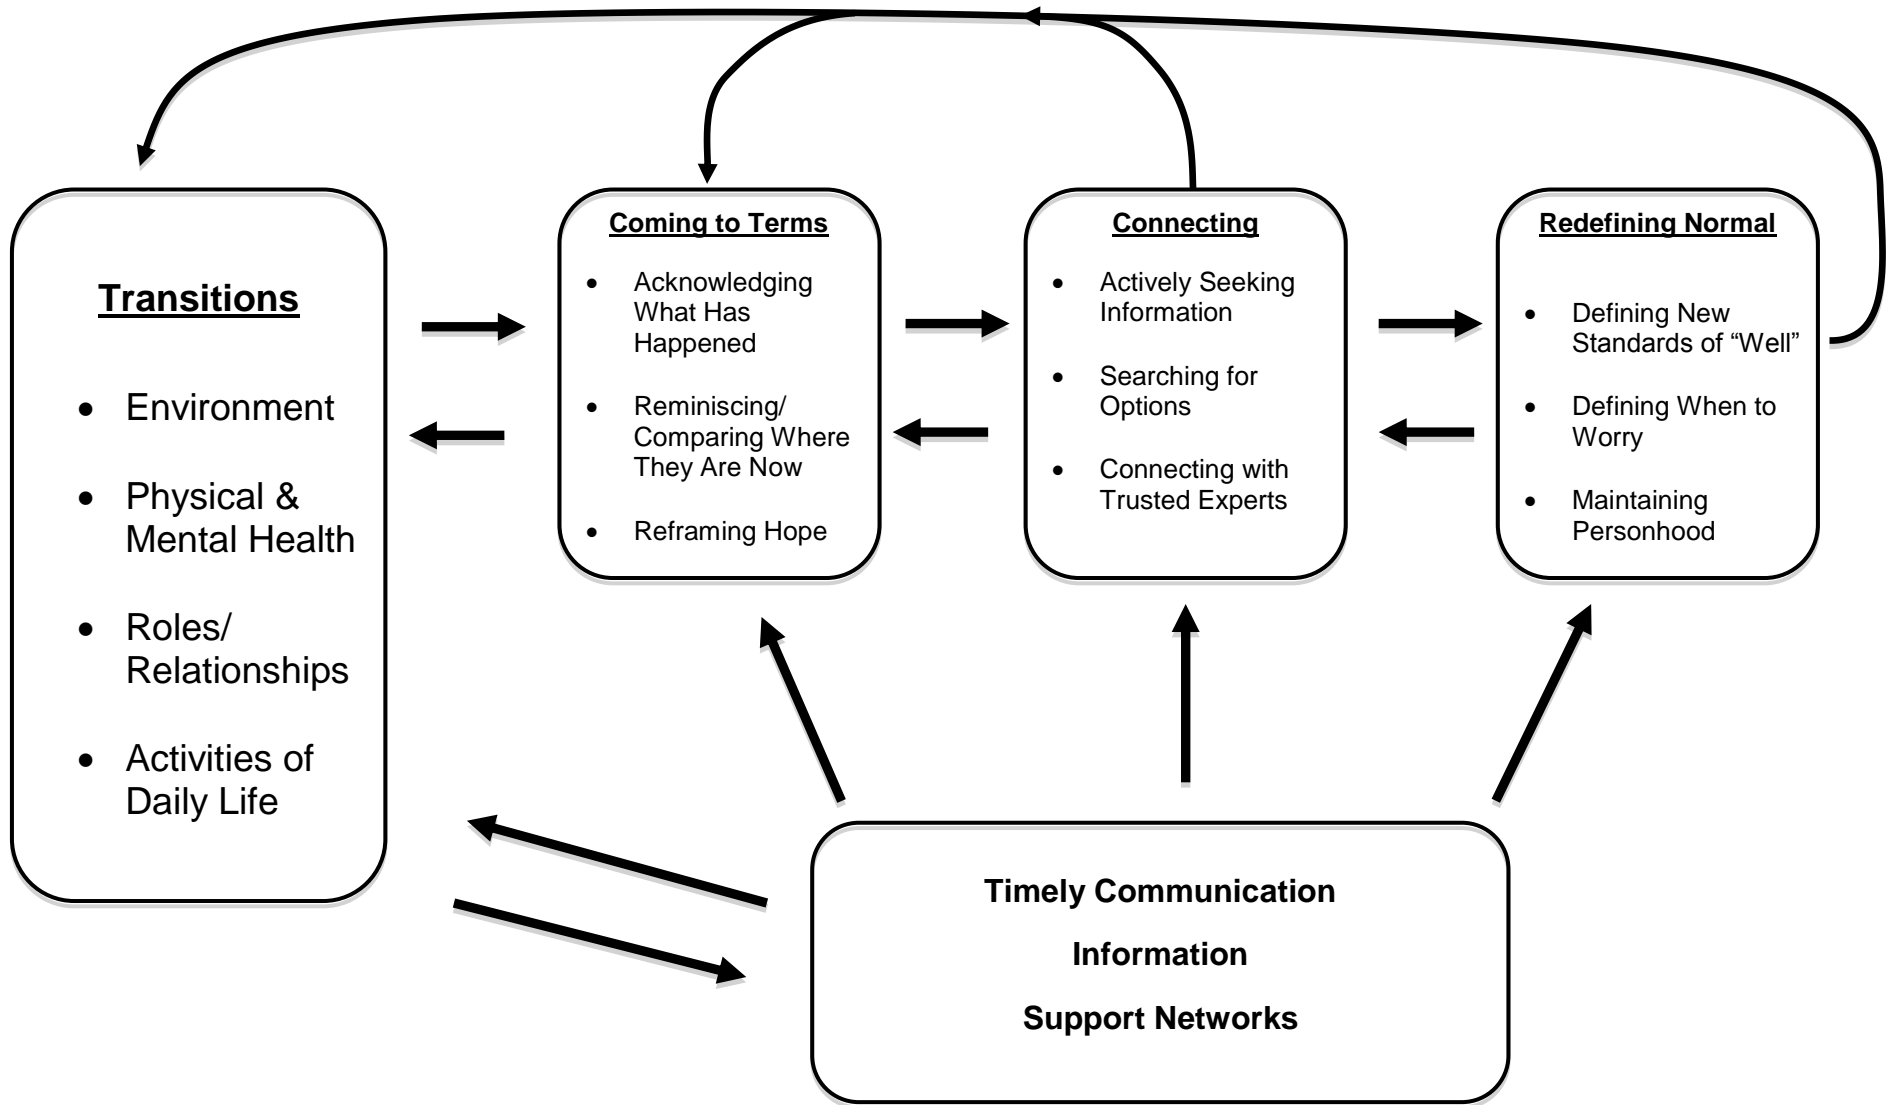

Supplement: MOESM1 [file 9518100]
